# Supplementary material for: Role of ELK1 in regulating colorectal cancer progression: miR-31-5p/CDIP1 axis in CRC pathogenesis
Source: PeerJ. 2023 Jul 31;11:e15602. doi: 10.7717/peerj.15602 (PMC10399563; doi:10.7717/peerj.15602)
Supplement: Supplemental Information 1 [file peerj-11-15602-s001.xlsx]

## Sheet: TargetScan7
Target gene	Role	Representative transcript	Gene name	3P-seq tags + 5	Cumulative weighted context++ score	Total context++ score	Aggregate PCT
RNF144B	Oncogenic	ENST00000259939.3	ring finger protein 144B	17	-1	-1	0.24
RSBN1	N/A	ENST00000261441.5	round spermatid basic protein 1	54	-0.93	-0.93	0.71
SH2D1A	N/A	ENST00000371139.4	SH2 domain containing 1A	5	-0.87	-0.87	0.32
IDE	N/A	ENST00000265986.6	insulin-degrading enzyme	446	-0.42	-0.87	0.42
AK4	Oncogenic	ENST00000545314.1	adenylate kinase 4	116	-0.86	-0.86	0.7
PAX9	Anti-oncogene	ENST00000361487.6	paired box 9	53	-0.77	-0.78	0.31
NR5A2	Oncogenic	ENST00000367362.3	nuclear receptor subfamily 5, group A, member 2	121	-0.68	-0.77	0.72
VTI1A	N/A	ENST00000393077.2	vesicle transport through interaction with t-SNAREs 1A	376	-0.38	-0.77	0.35
CDK1	Oncogenic	ENST00000395284.3	cyclin-dependent kinase 1	3029	-0.25	-0.73	0.44
ZDHHC18	Oncogenic	ENST00000374142.4	zinc finger, DHHC-type containing 18	268	-0.21	-0.73	0.5
ARHGEF2	N/A	ENST00000368315.4	Rho/Rac guanine nucleotide exchange factor (GEF) 2	313	-0.64	-0.71	0.24
LPP	Anti-oncogene	ENST00000312675.4	LIM domain containing preferred translocation partner in lipoma	1894	-0.69	-0.7	0.66
QKI	Oncogenic	ENST00000392127.2	QKI, KH domain containing, RNA binding	323	-0.27	-0.7	0.49
RBM23	N/A	ENST00000555209.1	RNA binding motif protein 23	1540	-0.26	-0.7	0.48
RAB5B	Oncogenic	ENST00000553116.1	RAB5B, member RAS oncogene family	14	-0.15	-0.7	0.41
HIF1AN	Oncogenic	ENST00000299163.6	hypoxia inducible factor 1, alpha subunit inhibitor	1545	-0.53	-0.69	0.76
PPP2R2A	Anti-oncogene	ENST00000380737.3	protein phosphatase 2, regulatory subunit B, alpha	236	-0.33	-0.69	0.31
PRKCE	Oncogenic	ENST00000306156.3	protein kinase C, epsilon	164	-0.68	-0.68	0.56
MMP16	Oncogenic	ENST00000286614.6	matrix metallopeptidase 16 (membrane-inserted)	12	-0.45	-0.68	0.74
VEZT	N/A	ENST00000436874.1	vezatin, adherens junctions transmembrane protein	1054	-0.43	-0.68	0.4
EIF5	N/A	ENST00000216554.3	eukaryotic translation initiation factor 5	970	-0.25	-0.68	0.59
TMEM145	N/A	ENST00000301204.3	transmembrane protein 145	5	-0.67	-0.67	0.51
FAM122A	Oncogenic	ENST00000394264.3	family with sequence similarity 122A	1277	-0.06	-0.66	0.24
SEPHS1	N/A	ENST00000545675.1	selenophosphate synthetase 1	281	-0.46	-0.65	0.51
SSH1	Oncogenic	ENST00000360239.3	slingshot protein phosphatase 1	115	-0.56	-0.64	0.4
MBOAT2	N/A	ENST00000305997.3	membrane bound O-acyltransferase domain containing 2	1145	-0.39	-0.64	0.61
WDR5	Oncogenic	ENST00000425041.1	WD repeat domain 5	889	-0.63	-0.63	0.57
PSMB11	N/A	ENST00000408907.2	proteasome (prosome, macropain) subunit, beta type, 11	5	-0.63	-0.63	0.31
SYDE2	N/A	ENST00000341460.5	synapse defective 1, Rho GTPase, homolog 2 (C. elegans)	72	-0.59	-0.62	0.69
PEX5	N/A	ENST00000266563.5	peroxisomal biogenesis factor 5	2114	-0.61	-0.61	0.62
SERTAD2	N/A	ENST00000313349.3	SERTA domain containing 2	119	-0.52	-0.61	0.52
RGS4	Oncogenic	ENST00000531057.1	regulator of G-protein signaling 4	489	-0.51	-0.61	0.3
DUSP7	Oncogenic	ENST00000495880.1	dual specificity phosphatase 7	68	-0.35	-0.61	0.65
FGF7	Oncogenic	ENST00000267843.4	fibroblast growth factor 7	5	-0.6	-0.6	0.45
PIK3C2A	Oncogenic	ENST00000265970.7	phosphatidylinositol-4-phosphate 3-kinase, catalytic subunit type 2 alpha	280	-0.44	-0.6	0.35
LPXN	Oncogenic	ENST00000395074.2	leupaxin	1533	0	-0.6	0.19
ZBTB20	Oncogenic	ENST00000462705.1	zinc finger and BTB domain containing 20	5	0	-0.6	0.57
UCK2	Oncogenic	ENST00000372212.4	uridine-cytidine kinase 2	437	-0.33	-0.59	< 0.1
TFRC	N/A	ENST00000540528.1	transferrin receptor	296	-0.56	-0.58	0.16
ITPA	Oncogenic	ENST00000380113.3	inosine triphosphatase (nucleoside triphosphate pyrophosphatase)	187	-0.3	-0.58	0.41
PDZD2	Oncogenic	ENST00000438447.1	PDZ domain containing 2	5	-0.57	-0.57	0.5
UBE2K	Oncogenic	ENST00000261427.5	ubiquitin-conjugating enzyme E2K	762	-0.53	-0.57	0.32
TMEM43	N/A	ENST00000306077.4	transmembrane protein 43	2575	-0.41	-0.57	0.31
IL34	Oncogenic	ENST00000429149.2	interleukin 34	5	-0.56	-0.56	0.58
CIAPIN1	Oncogenic	ENST00000565961.1	cytokine induced apoptosis inhibitor 1	423	-0.55	-0.56	0.29
MGAT1	Oncogenic	ENST00000333055.3	mannosyl (alpha-1,3-)-glycoprotein beta-1,2-N-acetylglucosaminyltransferase	831	-0.52	-0.56	0.56
KHDRBS3	Oncogenic	ENST00000355849.5	KH domain containing, RNA binding, signal transduction associated 3	11	-0.52	-0.56	0.33
RNF183	Oncogenic	ENST00000441031.3	ring finger protein 183	24	-0.4	-0.56	0.27
PC	Oncogenic	ENST00000529047.1	pyruvate carboxylase	798	-0.55	-0.55	0.52
TMPRSS11F	N/A	ENST00000356291.2	transmembrane protease, serine 11F	5	-0.55	-0.55	0.44
CRYBG3	Oncogenic	ENST00000389622.2	beta-gamma crystallin domain containing 3	46	-0.55	-0.55	0.28
GCNT4	Anti-oncogene	ENST00000322348.4	glucosaminyl (N-acetyl) transferase 4, core 2	19	-0.44	-0.55	0.61
EMP1	Oncogenic	ENST00000256951.5	epithelial membrane protein 1	814	-0.31	-0.55	0.31
VPS53	Anti-oncogene	ENST00000437048.2	vacuolar protein sorting 53 homolog (S. cerevisiae)	1332	-0.14	-0.55	0.3
EGLN3	Oncogenic	ENST00000250457.3	egl-9 family hypoxia-inducible factor 3	71	-0.54	-0.54	0.5
TBXA2R	N/A	ENST00000375190.4	thromboxane A2 receptor	169	-0.54	-0.54	0.45
HIAT1	N/A	ENST00000370152.3	hippocampus abundant transcript 1	1473	-0.54	-0.54	0.58
PPP1R9A	N/A	ENST00000289495.5	protein phosphatase 1, regulatory subunit 9A	46	-0.21	-0.54	0.59
CACNG4	N/A	ENST00000262138.3	calcium channel, voltage-dependent, gamma subunit 4	5	-0.53	-0.53	0.5
UCN2	Anti-oncogene	ENST00000273610.3	urocortin 2	44	-0.53	-0.53	0.31
TESK2	N/A	ENST00000372084.1	testis-specific kinase 2	11	-0.53	-0.53	0.59
JAZF1	Anti-oncogene	ENST00000283928.5	JAZF zinc finger 1	869	-0.19	-0.53	0.52
C17orf78	N/A	ENST00000586700.1	chromosome 17 open reading frame 78	5	-0.52	-0.52	0.31
CREG1	N/A	ENST00000370509.4	cellular repressor of E1A-stimulated genes 1	318	-0.45	-0.52	0.3
RHOBTB1	N/A	ENST00000337910.5	Rho-related BTB domain containing 1	229	-0.36	-0.52	0.55
PANK3	N/A	ENST00000239231.6	pantothenate kinase 3	522	-0.16	-0.52	0.47
TMEM220	N/A	ENST00000341871.3	transmembrane protein 220	143	-0.01	-0.52	0.25
JMJD8	Oncogenic	ENST00000412368.2	jumonji domain containing 8	164	-0.43	-0.51	< 0.1
DDTL	N/A	ENST00000215770.5	D-dopachrome tautomerase-like	7	-0.38	-0.51	ORF
AGO3	N/A	ENST00000373191.4	argonaute RISC catalytic component 3	198	-0.17	-0.51	0.59
FAM73A	N/A	ENST00000370791.3	family with sequence similarity 73, member A	837	-0.5	-0.5	0.31
AHCYL1	Anti-oncogene	ENST00000369799.5	adenosylhomocysteinase-like 1	1279	-0.5	-0.5	0.63
SPARC	Anti-oncogene	ENST00000231061.4	secreted protein, acidic, cysteine-rich (osteonectin)	2467	-0.49	-0.5	0.18
KANK1	Anti-oncogene	ENST00000382303.1	KN motif and ankyrin repeat domains 1	6	-0.49	-0.49	0.58
DCBLD2	Oncogenic	ENST00000326840.6	discoidin, CUB and LCCL domain containing 2	798	-0.48	-0.49	0.42
SEMA6D	Oncogenic	ENST00000355997.3	sema domain, transmembrane domain (TM), and cytoplasmic domain, (semaphorin) 6D	179	-0.47	-0.49	0.46
FAM53B	N/A	ENST00000337318.3	family with sequence similarity 53, member B	27	-0.48	-0.48	0.48
FLOT1	Oncogenic	ENST00000376389.3	flotillin 1	809	-0.48	-0.48	0.24
LBH	Oncogenic	ENST00000406087.1	limb bud and heart development	1956	-0.47	-0.48	0.29
GPRC5A	Oncogenic	ENST00000014914.5	G protein-coupled receptor, family C, group 5, member A	341	-0.24	-0.48	0.3
ALDH6A1	Anti-oncogene	ENST00000553458.1	aldehyde dehydrogenase 6 family, member A1	196	-0.04	-0.48	0.31
AP000695.1	N/A	ENST00000595927.1		5	-0.47	-0.47	0.39
TMED10	N/A	ENST00000303575.4	transmembrane emp24-like trafficking protein 10 (yeast)	1753	-0.47	-0.47	0.53
VAPB	Oncogenic	ENST00000395802.3	VAMP (vesicle-associated membrane protein)-associated protein B and C	391	-0.44	-0.47	0.48
PCDH8	Oncogenic	ENST00000377942.3	protocadherin 8	11	-0.42	-0.47	0.42
ELAVL1	Oncogenic	ENST00000407627.2	ELAV like RNA binding protein 1	2812	-0.3	-0.47	0.27
ATF6	N/A	ENST00000367942.3	activating transcription factor 6	382	-0.07	-0.47	0.38
AMER1	Anti-oncogene	ENST00000330258.3	APC membrane recruitment protein 1	11	-0.46	-0.46	0.44
FAM60A	Oncogenic	ENST00000539409.1	family with sequence similarity 60, member A	58	-0.46	-0.46	0.19
PAX5	Anti-oncogene	ENST00000358127.4	paired box 5	5	-0.46	-0.46	0.4
RASA1	Anti-oncogene	ENST00000456692.2	RAS p21 protein activator (GTPase activating protein) 1	1700	-0.46	-0.46	0.59
HOMER1	Oncogenic	ENST00000508576.1	homer homolog 1 (Drosophila)	394	-0.46	-0.46	0.55
CD28	Anti-oncogene	ENST00000324106.8	CD28 molecule	5	-0.46	-0.46	0.26
GXYLT1	N/A	ENST00000398675.3	glucoside xylosyltransferase 1	126	-0.45	-0.46	0.65
NDRG3	Anti-oncogene	ENST00000373803.2	NDRG family member 3	960	-0.45	-0.46	0.54
RNF144A	Anti-oncogene	ENST00000320892.6	ring finger protein 144A	124	-0.45	-0.46	0.32
PRKAR2A	N/A	ENST00000265563.8	protein kinase, cAMP-dependent, regulatory, type II, alpha	583	-0.44	-0.46	0.56
VPS26B	N/A	ENST00000281187.5	vacuolar protein sorting 26 homolog B (S. pombe)	1236	-0.43	-0.46	0.24
PXK	N/A	ENST00000463280.1	PX domain containing serine/threonine kinase	220	-0.41	-0.46	0.18
SLC31A1	N/A	ENST00000374212.4	solute carrier family 31 (copper transporter), member 1	171	-0.32	-0.46	0.3
RAB19	N/A	ENST00000275874.5	RAB19, member RAS oncogene family	7	-0.09	-0.46	0.5
AHSA2	N/A	ENST00000394457.3	AHA1, activator of heat shock 90kDa protein ATPase homolog 2 (yeast)	820	0	-0.46	0.59
FNDC5	Anti-oncogene	ENST00000496770.1	fibronectin type III domain containing 5	5	0	-0.46	0.32
ISL1	Oncogenic	ENST00000230658.7	ISL LIM homeobox 1	67	-0.45	-0.45	0.42
TIFAB	N/A	ENST00000537858.1	TRAF-interacting protein with forkhead-associated domain, family member B	5	-0.45	-0.45	0.37
SGMS1	Oncogenic	ENST00000361781.2	sphingomyelin synthase 1	100	-0.44	-0.45	0.47
CAMK2D	Oncogenic	ENST00000296402.5	calcium/calmodulin-dependent protein kinase II delta	938	-0.44	-0.45	0.59
APBB2	Anti-oncogene	ENST00000295974.8	amyloid beta (A4) precursor protein-binding, family B, member 2	704	-0.42	-0.45	0.68
KIAA1324L	N/A	ENST00000450689.2	KIAA1324-like	181	-0.23	-0.45	0.24
KCTD21	N/A	ENST00000340067.3	potassium channel tetramerization domain containing 21	90	-0.44	-0.44	0.34
STK40	Oncogenic	ENST00000359297.2	serine/threonine kinase 40	214	-0.4	-0.44	0.82
SOX11	Oncogenic	ENST00000322002.3	SRY (sex determining region Y)-box 11	1100	-0.3	-0.44	0.43
SH3BGRL2	N/A	ENST00000369838.4	SH3 domain binding glutamic acid-rich protein like 2	32	-0.28	-0.44	0.24
RAB6B	Oncogenic	ENST00000285208.4	RAB6B, member RAS oncogene family	669	-0.03	-0.44	0.58
VGLL3	N/A	ENST00000398399.2	vestigial like 3 (Drosophila)	187	-0.01	-0.44	0.58
ATP5S	N/A	ENST00000245448.6	ATP synthase, H+ transporting, mitochondrial Fo complex, subunit s (factor B)	310	-0.01	-0.44	0.46
KRT80	Oncogenic	ENST00000313234.5	keratin 80	617	-0.43	-0.43	0.52
SLC1A2	N/A	ENST00000278379.3	solute carrier family 1 (glial high affinity glutamate transporter), member 2	5	-0.43	-0.43	0.35
NUMB	Anti-oncogene	ENST00000554546.1	numb homolog (Drosophila)	2707	-0.42	-0.43	0.58
C2ORF15	N/A	ENST00000302513.2	Uncharacterized protein C2orf15	166	-0.15	-0.43	0.21
KCNN3	N/A	ENST00000271915.4	potassium intermediate/small conductance calcium-activated channel, subfamily N, member 3	5	-0.42	-0.42	0.66
MIXL1	N/A	ENST00000366810.5	Mix paired-like homeobox	16	-0.42	-0.42	0.16
OAS2	Oncogenic	ENST00000392583.2	2'-5'-oligoadenylate synthetase 2, 69/71kDa	5	-0.42	-0.42	0.28
KIAA1462	N/A	ENST00000375377.1	KIAA1462	360	-0.42	-0.42	0.24
CACYBP	Oncogenic	ENST00000367681.2	calcyclin binding protein	374	-0.41	-0.42	0.3
FAM118A	N/A	ENST00000216214.3	family with sequence similarity 118, member A	202	-0.39	-0.42	0.38
CHMP7	N/A	ENST00000313219.7	charged multivesicular body protein 7	124	-0.34	-0.42	0.44
CLSTN2	N/A	ENST00000458420.3	calsyntenin 2	119	-0.17	-0.42	0.38
FUBP1	N/A	ENST00000370767.1	far upstream element (FUSE) binding protein 1	2021	-0.15	-0.42	0.6
PDPR	N/A	ENST00000568530.1	pyruvate dehydrogenase phosphatase regulatory subunit	69	-0.14	-0.42	0.41
IPO11	Oncogenic	ENST00000409534.1	importin 11	202	-0.07	-0.42	0.24
MAP4K5	Oncogenic	ENST00000013125.4	mitogen-activated protein kinase kinase kinase kinase 5	634	-0.41	-0.41	0.54
BMPER	Oncogenic	ENST00000297161.2	BMP binding endothelial regulator	723	-0.41	-0.41	0.36
CCNT1	Oncogenic	ENST00000261900.3	cyclin T1	86	-0.34	-0.41	0.56
ST3GAL2	Oncogenic	ENST00000342907.2	ST3 beta-galactoside alpha-2,3-sialyltransferase 2	102	-0.27	-0.41	0.49
STARD13	Anti-oncogene	ENST00000336934.5	StAR-related lipid transfer (START) domain containing 13	314	-0.27	-0.41	0.55
HHIP	Anti-oncogene	ENST00000296575.3	hedgehog interacting protein	65	-0.22	-0.41	0.49
EIF4E3	N/A	ENST00000425534.3	eukaryotic translation initiation factor 4E family member 3	475	-0.11	-0.41	0.54
LATS2	Anti-oncogene	ENST00000382592.4	large tumor suppressor kinase 2	464	-0.4	-0.4	0.52
PTPLAD1	N/A	ENST00000261875.5	protein tyrosine phosphatase-like A domain containing 1	11697	-0.4	-0.4	0.24
PRELP	N/A	ENST00000343110.2	proline/arginine-rich end leucine-rich repeat protein	5	-0.4	-0.4	0.45
PPP6R3	N/A	ENST00000393800.2	protein phosphatase 6, regulatory subunit 3	400	-0.39	-0.4	0.2
NUP153	N/A	ENST00000262077.2	nucleoporin 153kDa	231	-0.28	-0.4	0.3
FXR1	Oncogenic	ENST00000357559.4	fragile X mental retardation, autosomal homolog 1	434	-0.24	-0.4	0.24
RAB31	Oncogenic	ENST00000578921.1	RAB31, member RAS oncogene family	726	-0.39	-0.39	0.24
KDELR2	Oncogenic	ENST00000258739.4	KDEL (Lys-Asp-Glu-Leu) endoplasmic reticulum protein retention receptor 2	5077	-0.39	-0.39	0.32
EDNRB	Oncogenic	ENST00000377211.4	endothelin receptor type B	5	-0.39	-0.39	0.23
PTGFRN	Oncogenic	ENST00000393203.2	prostaglandin F2 receptor inhibitor	591	-0.38	-0.39	0.39
CCNC	Oncogenic	ENST00000520371.1	cyclin C	524	-0.37	-0.39	0.21
EIF5A2	Oncogenic	ENST00000474096.1	eukaryotic translation initiation factor 5A2	443	-0.02	-0.39	0.34
TPD52	Oncogenic	ENST00000379096.5	tumor protein D52	4585	0	-0.39	0.29
GABBR1	N/A	ENST00000376977.3	gamma-aminobutyric acid (GABA) B receptor, 1	213	-0.38	-0.38	< 0.1
STX12	N/A	ENST00000373943.4	syntaxin 12	1082	-0.38	-0.38	0.34
GCH1	Oncogenic	ENST00000491895.2	GTP cyclohydrolase 1	502	-0.36	-0.38	ORF
MFAP3	N/A	ENST00000436816.1	microfibrillar-associated protein 3	1139	-0.36	-0.38	0.3
SATB2	Anti-oncogene	ENST00000417098.1	SATB homeobox 2	820	-0.34	-0.38	0.71
CDC42SE1	Oncogenic	ENST00000439374.2	CDC42 small effector 1	231	-0.3	-0.38	0.29
ARID1A	Oncogenic	ENST00000324856.7	AT rich interactive domain 1A (SWI-like)	31	-0.23	-0.38	0.55
NUFIP2	N/A	ENST00000225388.4	nuclear fragile X mental retardation protein interacting protein 2	440	-0.22	-0.38	0.67
NEK9	Oncogenic	ENST00000238616.5	NIMA-related kinase 9	733	-0.06	-0.38	0.24
IRS4	Oncogenic	ENST00000372129.2	insulin receptor substrate 4	56	-0.05	-0.38	0.42
ENY2	N/A	ENST00000520147.1	enhancer of yellow 2 homolog (Drosophila)	1814	-0.37	-0.37	0.24
RGAG1	N/A	ENST00000465301.2	retrotransposon gag domain containing 1	5	-0.37	-0.37	0.53
SIKE1	N/A	ENST00000369528.5	suppressor of IKBKE 1	281	-0.34	-0.37	0.31
SLC30A6	N/A	ENST00000282587.5	solute carrier family 30 (zinc transporter), member 6	711	-0.28	-0.37	0.29
BAHD1	N/A	ENST00000416165.1	bromo adjacent homology domain containing 1	76	-0.36	-0.36	0.32
FZD4	Oncogenic	ENST00000531380.1	frizzled family receptor 4	5	-0.36	-0.36	0.41
WBP11	N/A	ENST00000261167.2	WW domain binding protein 11	130	-0.34	-0.36	0.32
INSC	N/A	ENST00000528567.1	inscuteable homolog (Drosophila)	27	-0.25	-0.36	0.3
SMIM13	N/A	ENST00000416247.2	small integral membrane protein 13	199	-0.15	-0.36	0.25
RIMS3	N/A	ENST00000372684.3	regulating synaptic membrane exocytosis 3	24	-0.11	-0.36	0.58
UBE2N	Oncogenic	ENST00000550657.1	ubiquitin-conjugating enzyme E2N	321	-0.04	-0.36	0.53
CHSY1	Oncogenic	ENST00000254190.3	chondroitin sulfate synthase 1	200	-0.03	-0.36	0.24
POP4	N/A	ENST00000221770.3	processing of precursor 4, ribonuclease P/MRP subunit (S. cerevisiae)	985	0	-0.36	0.24
ZFP30	N/A	ENST00000392144.1	ZFP30 zinc finger protein	41	-0.35	-0.35	0.27
OPRL1	Oncogenic	ENST00000336866.2	opiate receptor-like 1	12	-0.35	-0.35	0.19
SLC6A6	Oncogenic	ENST00000454876.2	solute carrier family 6 (neurotransmitter transporter), member 6	280	-0.34	-0.35	0.71
EHBP1	N/A	ENST00000431489.1	EH domain binding protein 1	28	-0.29	-0.35	0.33
CEP85L	N/A	ENST00000368491.3	centrosomal protein 85kDa-like	14	-0.17	-0.35	0.4
KCTD20	Oncogenic	ENST00000373731.2	potassium channel tetramerization domain containing 20	88	-0.17	-0.35	0.57
RAP2B	Oncogenic	ENST00000323534.2	RAP2B, member of RAS oncogene family	594	-0.08	-0.35	0.3
RRP8	N/A	ENST00000254605.6	ribosomal RNA processing 8, methyltransferase, homolog (yeast)	423	-0.01	-0.35	0.34
EMC7	N/A	ENST00000256545.4	ER membrane protein complex subunit 7	672	0	-0.35	0.26
WNK1	Oncogenic	ENST00000315939.6	WNK lysine deficient protein kinase 1	950	-0.34	-0.34	0.32
GCLM	Anti-oncogene	ENST00000370238.3	glutamate-cysteine ligase, modifier subunit	809	-0.34	-0.34	0.31
SLC2A4	Oncogenic	ENST00000317370.8	solute carrier family 2 (facilitated glucose transporter), member 4	233	-0.34	-0.34	0.24
MAP1B	Oncogenic	ENST00000296755.7	microtubule-associated protein 1B	259	-0.32	-0.34	0.41
TMX4	N/A	ENST00000246024.2	thioredoxin-related transmembrane protein 4	466	-0.28	-0.34	0.54
PREPL	N/A	ENST00000541738.1	prolyl endopeptidase-like	612	-0.26	-0.34	0.55
EML5	N/A	ENST00000554922.1	echinoderm microtubule associated protein like 5	60	-0.13	-0.34	0.32
TMEM41A	N/A	ENST00000296254.3	transmembrane protein 41A	382	-0.07	-0.34	0.47
FTO	Oncogenic	ENST00000471389.1	fat mass and obesity associated	240	-0.01	-0.34	0.48
CCS	Oncogenic	ENST00000533244.1	copper chaperone for superoxide dismutase	2980	0	-0.34	0.2
KIAA1024	Anti-oncogene	ENST00000305428.3	KIAA1024	5	-0.33	-0.33	0.32
ZKSCAN8	N/A	ENST00000330236.6	zinc finger with KRAB and SCAN domains 8	281	-0.33	-0.33	0.16
ABLIM1	N/A	ENST00000392952.3	actin binding LIM protein 1	1321	-0.33	-0.33	0.42
CLASP2	N/A	ENST00000539981.1	cytoplasmic linker associated protein 2	554	-0.33	-0.33	0.45
SLC15A4	N/A	ENST00000266771.5	solute carrier family 15 (oligopeptide transporter), member 4	588	-0.33	-0.33	0.24
GJD2	N/A	ENST00000290374.4	gap junction protein, delta 2, 36kDa	5	-0.33	-0.33	0.29
PPP6C	Oncogenic	ENST00000373547.4	protein phosphatase 6, catalytic subunit	346	-0.31	-0.33	0.32
PDE4D	Oncogenic	ENST00000340635.6	phosphodiesterase 4D, cAMP-specific	747	-0.28	-0.33	0.3
EGLN1	N/A	ENST00000366641.3	egl-9 family hypoxia-inducible factor 1	505	-0.19	-0.33	0.24
HNRNPA0	Oncogenic	ENST00000314940.4	heterogeneous nuclear ribonucleoprotein A0	22668	0	-0.33	0.2
SYT6	N/A	ENST00000607941.1	synaptotagmin VI	5	-0.32	-0.32	0.32
GSTCD	N/A	ENST00000515279.1	glutathione S-transferase, C-terminal domain containing	411	-0.32	-0.32	0.35
ATL2	N/A	ENST00000406122.1	atlastin GTPase 2	1135	-0.32	-0.32	0.31
SIM1	N/A	ENST00000369208.3	single-minded homolog 1 (Drosophila)	104	-0.32	-0.32	0.26
SUPT16H	N/A	ENST00000216297.2	suppressor of Ty 16 homolog (S. cerevisiae)	528	-0.32	-0.32	0.37
BACH2	Anti-oncogene	ENST00000257749.4	BTB and CNC homology 1, basic leucine zipper transcription factor 2	74	-0.31	-0.32	0.57
HEYL	Oncogenic	ENST00000372852.3	hairy/enhancer-of-split related with YRPW motif-like	37	-0.1	-0.32	0.17
CBX5	Anti-oncogene	ENST00000209875.4	chromobox homolog 5	360	-0.08	-0.32	0.3
ZNF703	Oncogenic	ENST00000331569.4	zinc finger protein 703	1557	0	-0.32	0.51
PYURF	N/A	ENST00000273968.4	PIGY upstream reading frame	103	-0.31	-0.31	ORF
SRC	Oncogenic	ENST00000373578.2	v-src avian sarcoma (Schmidt-Ruppin A-2) viral oncogene homolog	170	-0.31	-0.31	0.37
TACC1	Oncogenic	ENST00000303230.4	hyperpolarization activated cyclic nucleotide-gated potassium channel 1	5	-0.31	-0.31	0.53
PHF21B	N/A	ENST00000403565.1	PHD finger protein 21B	8	-0.31	-0.31	0.45
COPS2	N/A	ENST00000388901.5	COP9 signalosome subunit 2	11120	-0.31	-0.31	0.32
YWHAE	Oncogenic	ENST00000264335.8	tyrosine 3-monooxygenase/tryptophan 5-monooxygenase activation protein, epsilon polypeptide	144	-0.29	-0.31	0.32
SRSF10	Oncogenic	ENST00000343255.5	serine/arginine-rich splicing factor 10	1920	-0.27	-0.31	0.46
FAM134B	Anti-oncogene	ENST00000399793.2	family with sequence similarity 134, member B	102	-0.22	-0.31	0.31
SNTB2	Oncogenic	ENST00000336278.4	syntrophin, beta 2 (dystrophin-associated protein A1, 59kDa, basic component 2)	254	-0.13	-0.31	0.45
MYCBP	Oncogenic	ENST00000397572.2	MYC binding protein	85	-0.08	-0.31	0.3
RAB9B	N/A	ENST00000243298.2	RAB9B, member RAS oncogene family	21	-0.3	-0.3	0.34
TMEM168	Oncogenic	ENST00000312814.6	transmembrane protein 168	195	-0.3	-0.3	0.24
NR2C2	Oncogenic	ENST00000425241.1	nuclear receptor subfamily 2, group C, member 2	227	-0.2	-0.3	0.32
CKAP4	Anti-oncogene	ENST00000378026.4	cytoskeleton-associated protein 4	1923	-0.18	-0.3	0.32
LSAMP	Anti-oncogene	ENST00000490035.2	limbic system-associated membrane protein	19	-0.07	-0.3	0.31
PPP3CA	N/A	ENST00000512215.1	protein phosphatase 3, catalytic subunit, alpha isozyme	259	-0.29	-0.29	0.31
ALKBH1	Anti-oncogene	ENST00000216489.3	alkB, alkylation repair homolog 1 (E. coli)	223	-0.29	-0.29	0.31
GLB1L	N/A	ENST00000295759.7	galactosidase, beta 1-like	192	-0.29	-0.29	0.24
TACC1	Anti-oncogene	ENST00000330691.6	transforming, acidic coiled-coil containing protein 1	186	-0.29	-0.29	0.32
MTFR1	Oncogenic	ENST00000458689.2	mitochondrial fission regulator 1	1051	-0.29	-0.29	0.29
TIA1	Oncogenic	ENST00000433529.2	TIA1 cytotoxic granule-associated RNA binding protein	1370	-0.29	-0.29	0.3
ZBTB34	N/A	ENST00000319119.4	zinc finger and BTB domain containing 34	726	-0.28	-0.29	0.24
POU2F1	Oncogenic	ENST00000367866.2	POU class 2 homeobox 1	83	-0.27	-0.29	0.59
DPYSL5	Oncogenic	ENST00000288699.6	dihydropyrimidinase-like 5	315	-0.24	-0.29	0.32
GNA13	Anti-oncogene	ENST00000439174.2	guanine nucleotide binding protein (G protein), alpha 13	190	-0.24	-0.29	0.49
VAMP4	N/A	ENST00000236192.7	vesicle-associated membrane protein 4	282	-0.22	-0.29	0.24
C11orf87	N/A	ENST00000327419.6	chromosome 11 open reading frame 87	5	-0.2	-0.29	0.3
SLC5A3	Oncogenic	ENST00000608209.1	sodium/myo-inositol cotransporter	24	-0.19	-0.29	0.54
TM9SF3	N/A	ENST00000371142.4	transmembrane 9 superfamily member 3	1030	-0.18	-0.29	0.32
DACH1	Anti-oncogene	ENST00000305425.4	dachshund homolog 1 (Drosophila)	18	-0.08	-0.29	0.57
LITAF	Anti-oncogene	ENST00000413364.2	lipopolysaccharide-induced TNF factor	11008	-0.28	-0.28	0.3
MRPL48	N/A	ENST00000535529.1	mitochondrial ribosomal protein L48	354	-0.28	-0.28	0.24
KLF13	Oncogenic	ENST00000307145.3	Kruppel-like factor 13	5	-0.28	-0.28	0.48
ANKFY1	N/A	ENST00000341657.4	ankyrin repeat and FYVE domain containing 1	969	-0.28	-0.28	0.53
XKR6	N/A	ENST00000304437.2	XK, Kell blood group complex subunit-related family, member 6	5	-0.28	-0.28	0.33
VAV3	Oncogenic	ENST00000370056.4	vav 3 guanine nucleotide exchange factor	1128	-0.28	-0.28	0.32
CEBPA	Oncogenic	ENST00000498907.2	CCAAT/enhancer binding protein (C/EBP), alpha	12449	-0.27	-0.28	0.24
FZD3	Anti-oncogene	ENST00000240093.3	frizzled family receptor 3	192	-0.26	-0.28	0.59
SLC43A2	N/A	ENST00000301335.5	solute carrier family 43 (amino acid system L transporter), member 2	68	-0.25	-0.28	0.62
AP1S1	N/A	ENST00000337619.5	adaptor-related protein complex 1, sigma 1 subunit	750	-0.21	-0.28	0.24
HERPUD2	N/A	ENST00000396081.1	HERPUD family member 2	30	-0.21	-0.28	0.32
MBNL3	Oncogenic	ENST00000370839.3	muscleblind-like splicing regulator 3	593	-0.2	-0.28	0.28
CACUL1	Oncogenic	ENST00000369151.3	CDK2-associated, cullin domain 1	213	-0.16	-0.28	0.36
GSG1L	N/A	ENST00000380898.2	GSG1-like	5	-0.27	-0.27	0.17
AP2B1	N/A	ENST00000262325.7	adaptor-related protein complex 2, beta 1 subunit	353	-0.27	-0.27	0.32
TACC2	N/A	ENST00000513429.1	transforming, acidic coiled-coil containing protein 2	225	-0.21	-0.27	0.32
DPY19L3	N/A	ENST00000586987.1	dpy-19-like 3 (C. elegans)	146	-0.21	-0.27	0.32
FITM2	N/A	ENST00000396825.3	fat storage-inducing transmembrane protein 2	215	-0.19	-0.27	0.38
CTIF	N/A	ENST00000256413.3	CBP80/20-dependent translation initiation factor	154	-0.17	-0.27	0.24
ZDHHC21	N/A	ENST00000380916.4	zinc finger, DHHC-type containing 21	196	-0.03	-0.27	0.4
YARS2	N/A	ENST00000324868.8	tyrosyl-tRNA synthetase 2, mitochondrial	192	-0.01	-0.27	0.29
MYO19	N/A	ENST00000431794.3	myosin XIX	615	-0.26	-0.26	0.24
NCK2	N/A	ENST00000451463.2	NCK adaptor protein 2	178	-0.26	-0.26	0.31
ADCY6	Oncogenic	ENST00000357869.3	adenylate cyclase 6	6	-0.26	-0.26	0.5
PSMB2	Oncogenic	ENST00000373237.3	proteasome (prosome, macropain) subunit, beta type, 2	19765	-0.26	-0.26	0.24
ARHGEF26	Oncogenic	ENST00000356448.4	Rho guanine nucleotide exchange factor (GEF) 26	164	-0.25	-0.26	0.24
ZSWIM6	N/A	ENST00000252744.5	zinc finger, SWIM-type containing 6	933	-0.25	-0.26	0.32
TENM4	N/A	ENST00000278550.7	teneurin transmembrane protein 4	34	-0.24	-0.26	< 0.1
ZFP36L1	Anti-oncogene	ENST00000555997.1	ZFP36 ring finger protein-like 1	231	-0.22	-0.26	0.31
AMOTL1	Oncogenic	ENST00000317837.9	angiomotin like 1	712	-0.22	-0.26	0.22
AFF1	N/A	ENST00000395146.4	AF4/FMR2 family, member 1	28	-0.16	-0.26	0.5
FBXL4	N/A	ENST00000369244.2	F-box and leucine-rich repeat protein 4	321	-0.16	-0.26	0.54
FRK	Anti-oncogene	ENST00000606080.1	fyn-related kinase	37	-0.1	-0.26	0.31
KIF1C	Oncogenic	ENST00000320785.5	kinesin family member 1C	149	-0.05	-0.26	0.29
GPR108	N/A	ENST00000264080.7	G protein-coupled receptor 108	676	-0.01	-0.26	0.3
BOD1L2	N/A	ENST00000585477.1	biorientation of chromosomes in cell division 1-like 2	5	-0.25	-0.25	0.24
MMS19	N/A	ENST00000327277.7	MMS19 nucleotide excision repair homolog (S. cerevisiae)	1062	-0.25	-0.25	ORF
CYSLTR2	N/A	ENST00000282018.3	cysteinyl leukotriene receptor 2	5	-0.25	-0.25	0.24
AGRN	Oncogenic	ENST00000379370.2	agrin	11	-0.25	-0.25	0.32
SALL2	Anti-oncogene	ENST00000327430.3	sal-like 2 (Drosophila)	233	-0.25	-0.25	0.21
APP	N/A	ENST00000346798.3	amyloid beta (A4) precursor protein	4570	-0.25	-0.25	0.32
RBM8A	Oncogenic	ENST00000330165.8	RNA binding motif protein 8A	33	-0.25	-0.25	0.59
MYO5A	Oncogenic	ENST00000399231.3	myosin VA (heavy chain 12, myoxin)	573	-0.22	-0.25	0.66
GPRIN3	N/A	ENST00000609438.1	GPRIN family member 3	213	-0.2	-0.25	0.24
FAM78A	N/A	ENST00000372269.3	family with sequence similarity 78, member A	7	-0.18	-0.25	0.24
HELZ	N/A	ENST00000358691.5	helicase with zinc finger	571	-0.18	-0.25	0.48
DGKH	N/A	ENST00000261491.5	diacylglycerol kinase, eta	46	-0.15	-0.25	0.24
UACA	Anti-oncogene	ENST00000322954.6	uveal autoantigen with coiled-coil domains and ankyrin repeats	82	-0.13	-0.25	0.44
SFXN1	Oncogenic	ENST00000321442.5	sideroflexin 1	1018	-0.08	-0.25	0.57
YLPM1	N/A	ENST00000552421.1	YLP motif containing 1	1542	0	-0.25	0.36
RBMS1	Anti-oncogene	ENST00000348849.3	RNA binding motif, single stranded interacting protein 1	90	-0.24	-0.24	0.24
SH3BP1	Oncogenic	ENST00000357436.4	SH3-domain binding protein 1	2333	-0.24	-0.24	0.3
LRRC55	N/A	ENST00000497933.1	leucine rich repeat containing 55	5	-0.24	-0.24	0.18
CLOCK	Oncogenic	ENST00000309964.4	clock circadian regulator	86	-0.24	-0.24	0.46
ALX4	Anti-oncogene	ENST00000329255.3	ALX homeobox 4	52	-0.24	-0.24	0.32
RAB27A	Oncogenic	ENST00000396307.2	RAB27A, member RAS oncogene family	181	-0.24	-0.24	0.49
SCN2A	N/A	ENST00000375437.2	sodium channel, voltage-gated, type II, alpha subunit	7	-0.24	-0.24	0.31
DGCR8	Oncogenic	ENST00000383024.2	DGCR8 microprocessor complex subunit	1018	-0.22	-0.24	0.31
PHF12	Oncogenic	ENST00000577226.1	PHD finger protein 12	307	-0.09	-0.24	0.4
EPC1	Oncogenic	ENST00000319778.6	enhancer of polycomb homolog 1 (Drosophila)	102	-0.04	-0.24	0.31
TTC31	N/A	ENST00000410003.1	tetratricopeptide repeat domain 31	132	-0.23	-0.23	0.19
GLTSCR1	N/A	ENST00000396720.3	glioma tumor suppressor candidate region gene 1	36	-0.23	-0.23	0.31
VPS39	N/A	ENST00000318006.5	vacuolar protein sorting 39 homolog (S. cerevisiae)	165	-0.23	-0.23	0.31
PRSS8	Anti-oncogene	ENST00000317508.6	protease, serine, 8	5	-0.23	-0.23	0.3
AK2	Oncogenic	ENST00000467905.1	adenylate kinase 2	3125	-0.23	-0.23	0.31
SNX22	N/A	ENST00000325881.4	sorting nexin 22	5	-0.23	-0.23	ORF
KLF7	Oncogenic	ENST00000423015.1	Kruppel-like factor 7 (ubiquitous)	737	-0.22	-0.23	0.29
SNN	Oncogenic	ENST00000329565.5	stannin	663	-0.22	-0.23	0.29
PRKAA2	Anti-oncogene	ENST00000371244.4	protein kinase, AMP-activated, alpha 2 catalytic subunit	561	-0.21	-0.23	0.17
CDIP1	Anti-oncogene	ENST00000564828.1	cell death-inducing p53 target 1	1857	-0.15	-0.23	0.31
KIAA0226	N/A	ENST00000273582.5	KIAA0226	89	-0.12	-0.23	0.29
GJA9	N/A	ENST00000454994.2	gap junction protein, alpha 9, 59kDa	85	-0.06	-0.23	0.29
CTH	Oncogenic	ENST00000411986.2	cystathionase (cystathionine gamma-lyase)	430	-0.04	-0.23	0.19
PIGV	N/A	ENST00000078527.4	phosphatidylinositol glycan anchor biosynthesis, class V	122	-0.04	-0.23	0.24
LMAN2	N/A	ENST00000515209.1	lectin, mannose-binding 2	2441	-0.02	-0.23	0.3
WDR12	N/A	ENST00000261015.4	WD repeat domain 12	444	-0.02	-0.23	0.29
SAMD12	N/A	ENST00000409003.4	sterile alpha motif domain containing 12	57	-0.22	-0.22	0.24
SAMD10	N/A	ENST00000369886.3	sterile alpha motif domain containing 10	45	-0.22	-0.22	0.29
EBF3	Anti-oncogene	ENST00000368648.3	early B-cell factor 3	101	-0.22	-0.22	0.32
RDX	N/A	ENST00000343115.4	radixin	44	-0.22	-0.22	0.24
RIMKLB	N/A	ENST00000357529.3	ribosomal modification protein rimK-like family member B	164	-0.2	-0.22	0.3
PAPOLA	N/A	ENST00000557471.1	poly(A) polymerase alpha	1229	-0.17	-0.22	ORF
TEX261	N/A	ENST00000272438.4	testis expressed 261	359	-0.16	-0.22	0.31
KDM5A	Oncogenic	ENST00000399788.2	lysine (K)-specific demethylase 5A	118	-0.08	-0.22	0.3
SRGAP3	N/A	ENST00000383836.3	SLIT-ROBO Rho GTPase activating protein 3	38	-0.04	-0.22	0.32
TNS1	Oncogenic	ENST00000171887.4	tensin 1	591	-0.21	-0.21	0.59
ZNF384	Oncogenic	ENST00000319770.3	zinc finger protein 384	8	-0.21	-0.21	0.3
CNNM1	Oncogenic	ENST00000356713.4	cyclin M1	45	-0.21	-0.21	0.43
RPH3A	N/A	ENST00000415485.3	rabphilin 3A homolog (mouse)	5	-0.21	-0.21	0.3
ETV3	Oncogenic	ENST00000368192.4	ets variant 3	37	-0.21	-0.21	0.21
HSPD1	Oncogenic	ENST00000388968.3	heat shock 60kDa protein 1 (chaperonin)	42	-0.21	-0.21	0.24
GRB10	Oncogenic	ENST00000398812.2	growth factor receptor-bound protein 10	1382	-0.21	-0.21	0.31
PDZD4	N/A	ENST00000164640.4	PDZ domain containing 4	7	-0.21	-0.21	0.24
C9orf114	N/A	ENST00000361256.5	chromosome 9 open reading frame 114	488	-0.12	-0.21	< 0.1
FCHSD2	N/A	ENST00000311172.7	FCH and double SH3 domains 2	73	-0.09	-0.21	0.17
SLC25A16	N/A	ENST00000609923.1	solute carrier family 25 (mitochondrial carrier; Graves disease autoantigen), member 16	206	-0.01	-0.21	0.24
RBM48	N/A	ENST00000481551.1	RNA binding motif protein 48	220	0	-0.21	0.44
CTNND2	N/A	ENST00000304623.8	catenin (cadherin-associated protein), delta 2	25	-0.2	-0.2	0.32
GPR137	Oncogenic	ENST00000539851.1	G protein-coupled receptor 137	202	-0.2	-0.2	ORF
OXSR1	N/A	ENST00000311806.3	oxidative stress responsive 1	1790	-0.2	-0.2	0.3
EIF1	N/A	ENST00000469257.1	eukaryotic translation initiation factor 1	415	-0.2	-0.2	0.24
ZDHHC20	N/A	ENST00000320220.9	zinc finger, DHHC-type containing 20	1486	-0.2	-0.2	0.3
AL590483.1	N/A	ENST00000598000.1	Uncharacterized protein; cDNA FLJ42623 fis, clone BRACE3015894	5	-0.2	-0.2	0.24
PLEKHA1	N/A	ENST00000538022.1	pleckstrin homology domain containing, family A (phosphoinositide binding specific) member 1	1172	-0.2	-0.2	ORF
C17orf102	N/A	ENST00000357754.1	chromosome 17 open reading frame 102	5	-0.2	-0.2	0.3
FAM135B	Oncogenic	ENST00000395297.1	family with sequence similarity 135, member B	5	-0.2	-0.2	0.31
OSBP2	Oncogenic	ENST00000382310.3	oxysterol binding protein 2	485	-0.19	-0.2	0.49
ZSCAN25	N/A	ENST00000394152.2	zinc finger and SCAN domain containing 25	230	-0.14	-0.2	0.31
RABL3	Oncogenic	ENST00000273375.3	RAB, member of RAS oncogene family-like 3	165	-0.1	-0.2	0.3
HBEGF	N/A	ENST00000230990.6	heparin-binding EGF-like growth factor	28	-0.08	-0.2	0.3
EDC3	N/A	ENST00000315127.4	enhancer of mRNA decapping 3	328	-0.06	-0.2	0.36
DMD	N/A	ENST00000378677.2	dystrophin	211	-0.04	-0.2	0.24
CCDC113	N/A	ENST00000443128.2	coiled-coil domain containing 113	29	-0.03	-0.2	0.3
COQ7	N/A	ENST00000321998.5	coenzyme Q7 homolog, ubiquinone (yeast)	315	-0.01	-0.2	0.29
CNTD1	N/A	ENST00000588408.1	cyclin N-terminal domain containing 1	7	0	-0.2	ORF
ZNF652	N/A	ENST00000362063.2	zinc finger protein 652	33	0	-0.2	0.24

## Sheet: Sheet1
Target gene
PAX9
LPP
PPP2R2A
GCNT4
VPS53
UCN2
JAZF1
AHCYL1
SPARC
KANK1
ALDH6A1
AMER1
PAX5
RASA1
CD28
NDRG3
RNF144A
FNDC5
APBB2
NUMB
STARD13
HHIP
LATS2
SATB2
GCLM
KIAA1024
BACH2
CBX5
FAM134B
CKAP4
LSAMP
ALKBH1
TACC1
GNA13
DACH1
LITAF
FZD3
ZFP36L1
FRK
SALL2
UACA
RBMS1
ALX4
PRSS8
PRKAA2
CDIP1
EBF3
